# Supplementary material for: A novel label-free electrochemical immunosensor based on the composite of LPCs-SnS2and AuNPs for the detection of human chorionic gonadotropin
Source: Royal Society of Chemistry journal article supplement (doi:10.1039/c7nj01774j), 2017-01-01
Supplement: c7nj01774j1.pdf [file c7nj01774j1.pdf]

**Supporting Information**

**A novel label-free electrochemical immunosensor based on the composite of LPCs-SnS<sub>2</sub>  
and AuNPs for the detection of human chorionic gonadotropin**

Hejie Wang, Wenjuan Guo\*, Meishan Pei

School of Chemistry and Chemical Engineering, University of Jinan, Jinan 250022, P. R. China.

\*Author to whom correspondence should be addressed.

E-mail: chm\_guowj@163.com; Tel: +86-13589066804

The FTIR spectra of the LPCs was shown in Fig. S1, the broad peak at  $3435\text{ cm}^{-1}$  are associated with the typical O–H stretching vibrations<sup>1,2</sup>. The peak at  $1734\text{ cm}^{-1}$  was stretching vibration absorbance of C=O<sup>1,3</sup>. In addition, the bands in  $1000\text{--}1300\text{ cm}^{-1}$  were attributed to C–OH stretching and O–H bending vibrations<sup>4,5</sup>. These results indicated that the LPCs had abundant oxygen containing functional groups

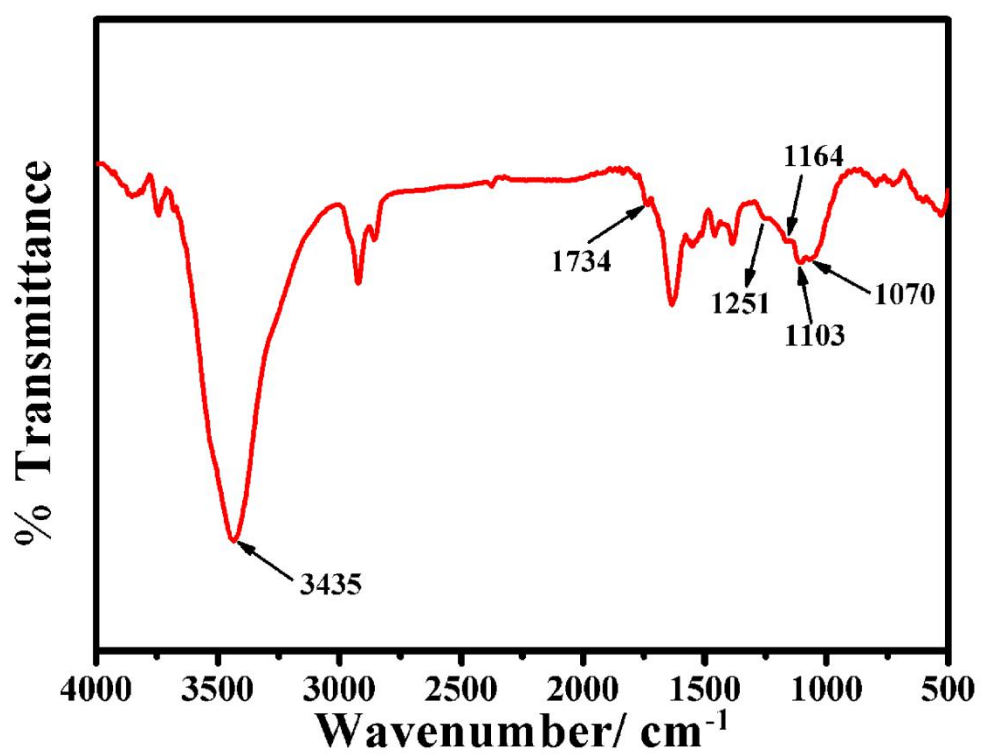

Fig. S1. The FTIR spectra of LPCs

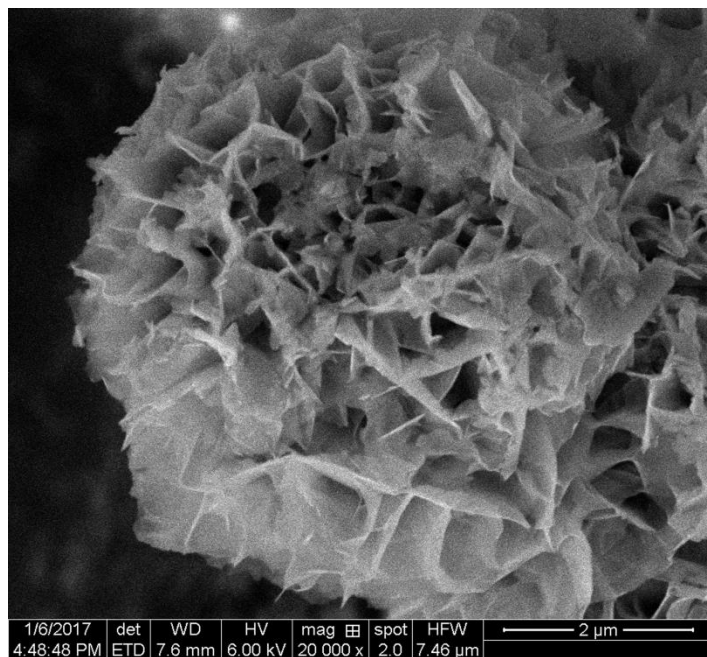

**Fig. S2.** SEM images of pure SnS<sub>2</sub>

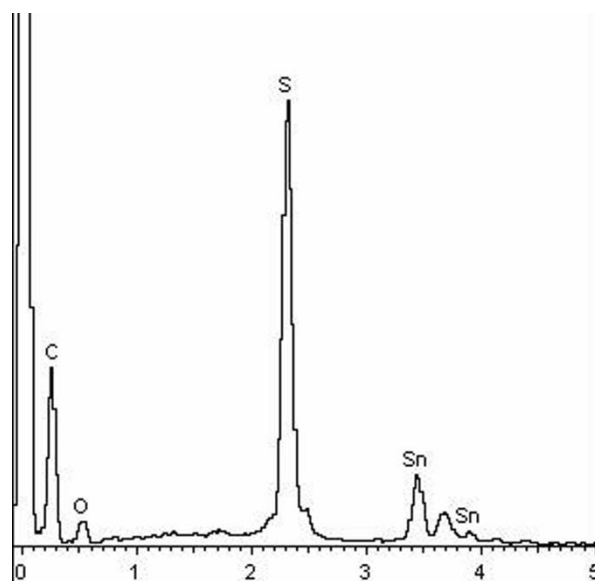

**Fig. S3.** EDS of LPCs-SnS<sub>2</sub>-2

#### References

- 1 S. S. Pan, L. N. Wang, X. Chen, Y. Tang, Y. M. Chen, Y. Z. Sun, X. J. Yang and P. Y. Wan, *Electrochim. Acta*, 2016, 203, 301-308.
- 2 Z. Y. Zhao, Z. H. Yang, Y. W. Hu, J. P. Li and X. M. Fan, *Appl Surf Sci*, 2013, 276, 476-481.
- 3 L. Zhu, Y. Wang, Y. X. Wang, L. J. You, X. Q. Shen and S. J. Li, *MICROPOR MESOPOR MAT*, 2017, 241, 285-292.
- 4 L. Stobinski, B. Lesiak, L. Kövér, J. Tóth, S. Biniak, G. Trykowski and J. Judek, *J ALLOY COMPD*, 2010, 501, 77-84.
- 5 S. C. Zhang, R. R. Hu, P. Dai, X. X. Yu, Z. L. Ding, M. Z. Wu, G. Li, Y. Q. Ma and C. J. Tu, *Appl Surf Sci*, 2017, 396, 994-999.
